# Supplementary material for: A photo-switchable rectifier based on the MAPbBr3–MAPbCl3 halide perovskite heterostructure for dual-wavelength optical communications
Source: Royal Society of Chemistry journal article supplement (doi:10.1039/d3tc01928d), 2023-01-01
Supplement: d3tc01928d1.pdf [file d3tc01928d1.pdf]

1

## Supporting Information

### 2 **Photo-Switchable Rectifier Based on MAPbBr<sub>3</sub>-MAPbCl<sub>3</sub> Halide** 3 **Perovskite Heterostructure for Dual-Wavelength Optical** 4 **Communications**

5 Yun-Peng Zhao <sup>a, b, #</sup>, Zhi-Hong Zhang <sup>b, c, #</sup>, Shan-Shan Yan <sup>b</sup>, Bao-Shi Qiao <sup>b</sup>, Zhen-  
6 Dong Lian <sup>b</sup>, Zhi-Peng Wei <sup>c</sup>, Francis Chi-Chung Ling <sup>d</sup>, Hong-Yu Chen <sup>a</sup>, Shi-Chen  
7 Su <sup>a, \*</sup>, Kar Wei Ng <sup>b, \*</sup>, and Shuang-Peng Wang <sup>b, \*</sup>

8 *<sup>a</sup> School of Semiconductor Science and Technology, South China Normal University,*  
9 *Foshan 528000, China*

10 *<sup>b</sup> Instituted of Applied Physics and Materials Engineering, University of Macau, Taipa*  
11 *999078, Macau SAR, China*

12 *<sup>c</sup> State Key Laboratory of High Power Semiconductor Lasers, Changchun University*  
13 *of Science and Technology, Changchun 130022, China*

14 *<sup>d</sup> Department of Physics, The University of Hong Kong, Hong Kong 999077, China*

15

16 <sup>#</sup> These authors contributed equally.

17 \*Corresponding Authors:

18 Shuang-Peng WANG: [spwang@um.edu.mo](mailto:spwang@um.edu.mo) (Email) +853 8822 4048 (Tel.)

19 Kar Wei NG: [billyng@um.edu.mo](mailto:billyng@um.edu.mo) (Email)

20 Shi-Chen SU: [shichensu@scnu.edu.cn](mailto:shichensu@scnu.edu.cn) (Email)

21

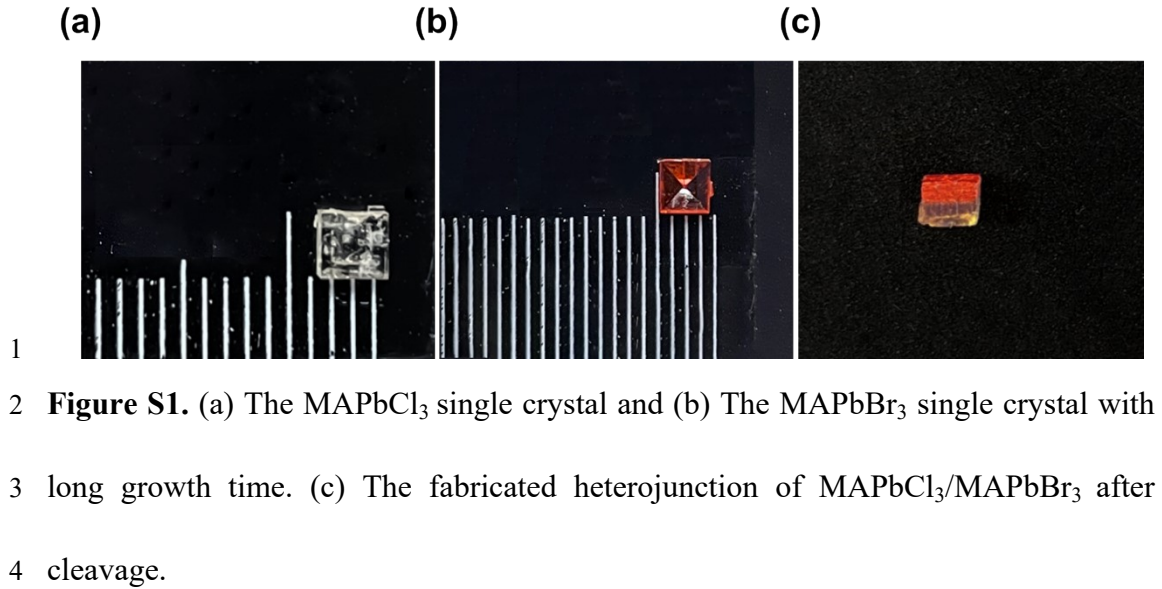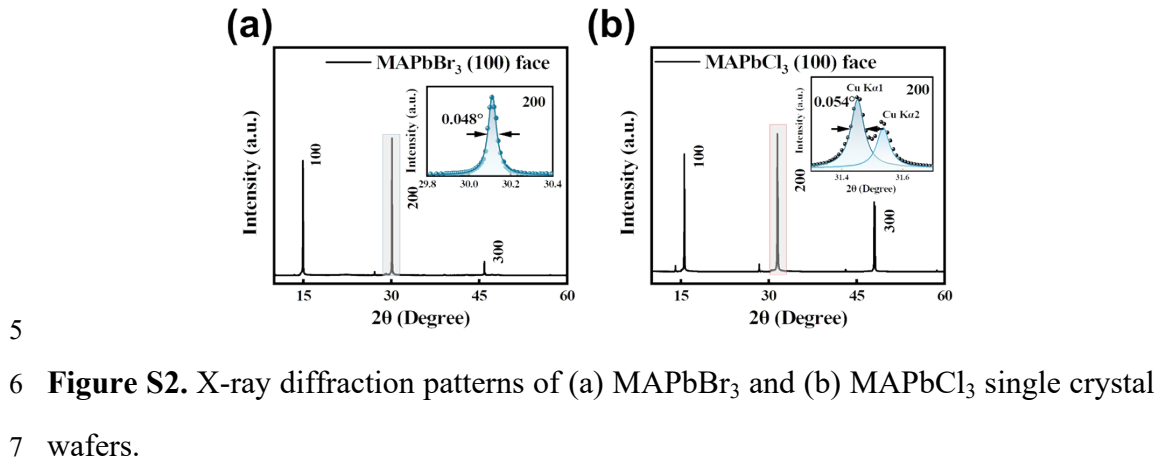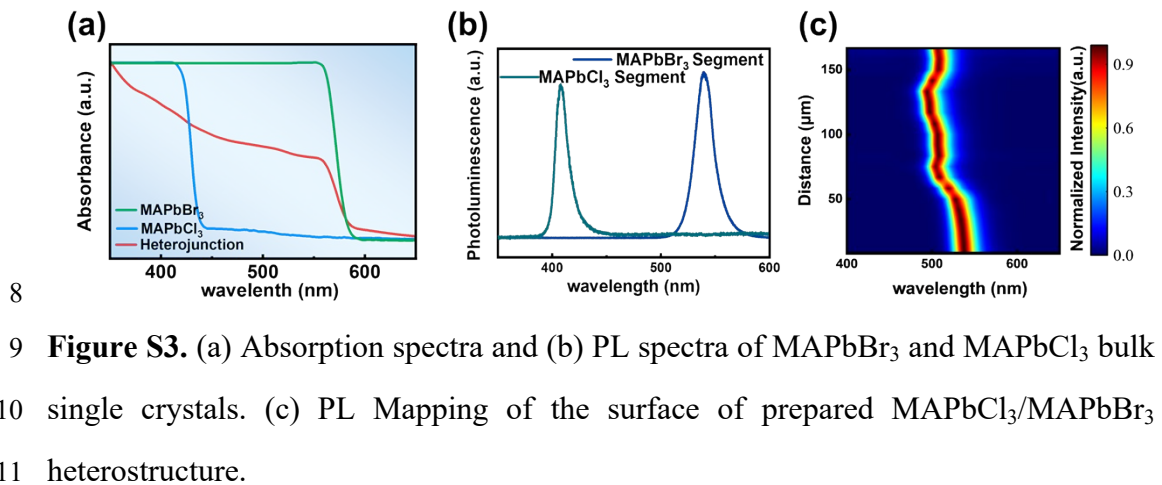

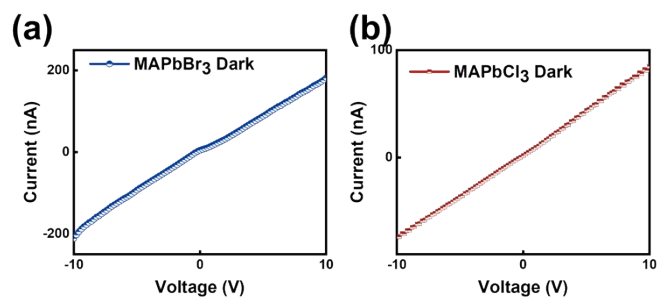

1

2 **Figure S4.** Dark current of (a) MAPbBr<sub>3</sub> bulk single crystal and (b) MAPbCl<sub>3</sub> bulk  
3 single crystal.

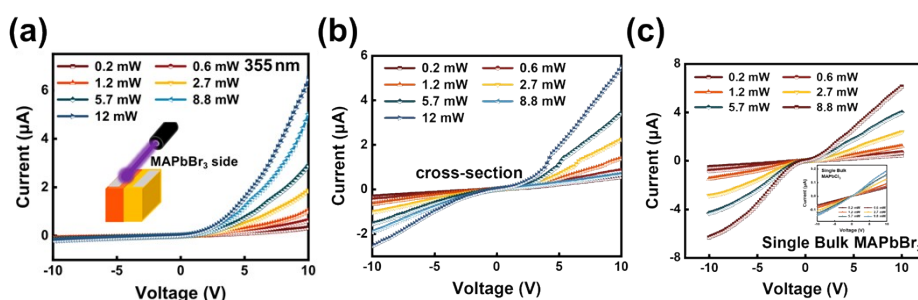

4

5 **Figure S5.** (a)  $I$ - $V$  characteristics of the heterostructure device irradiation MAPbBr<sub>3</sub>  
6 segment measured under a 355 nm laser with different intensities. (b) The  $I$ - $V$   
7 characteristics of the heterostructure under 355 nm illumination (c) The  $I$ - $V$   
8 characteristics of bulk single crystals.

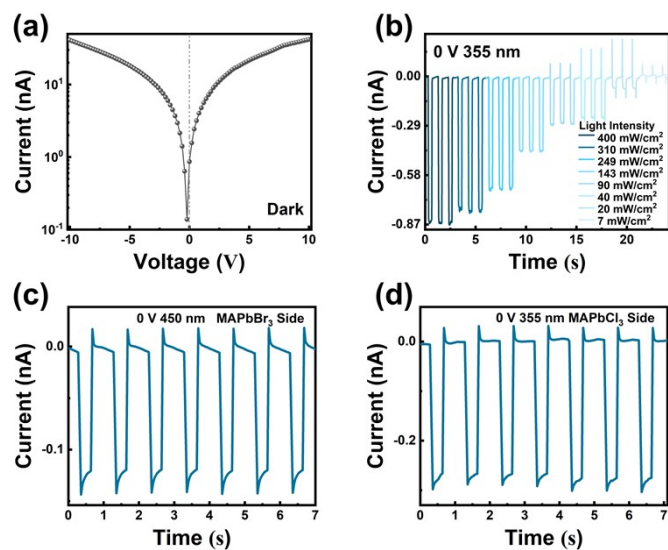

9

10 **Figure S6.** (a) Dark current curve of heterostructure device. (b) Under 355 nm  
11 illumination, The  $I$ - $t$  curves of the device at 0 V bias. (c and d) Self-driven

- 1 characteristics of the device when irradiated at 450 nm on the MAPbBr<sub>3</sub> side and 355
- 2 nm on the MAPbCl<sub>3</sub> side.

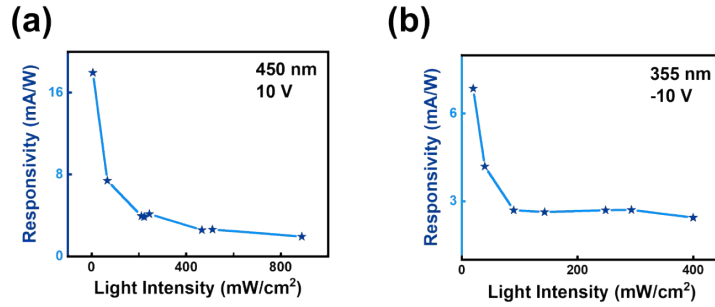

3  
4 **Figure S7.** Plots of the responsivity as a function of light intensity under (a) 450 nm  
5 with 10 V bias and (b) 355 nm laser with -10 V bias.

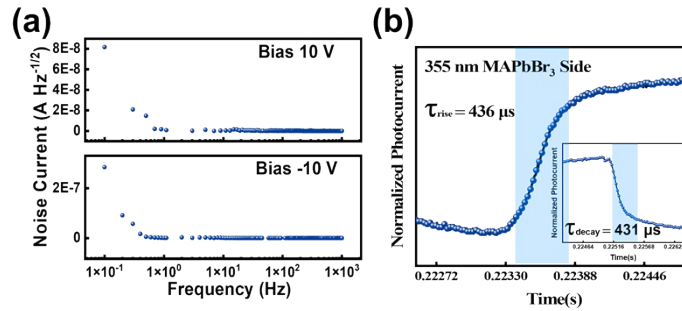

6  
7 **Figure S8.** (a) The noise current of the device under 10 V and -10 V biases. (b) the rise  
8 and fall times of the device under 355 nm illumination.

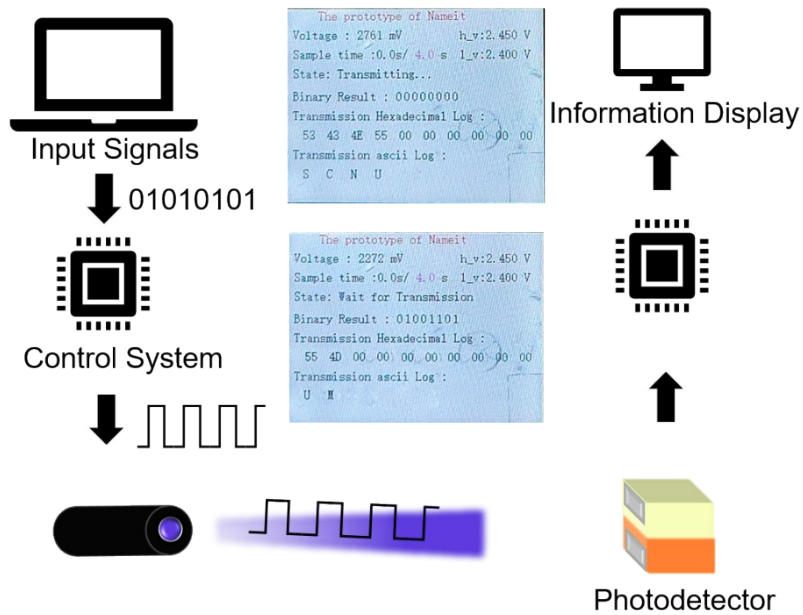

1

2 **Figure S9.** Schematic diagram of the dual-colored optical communication system based  
 3 on the photodetector.

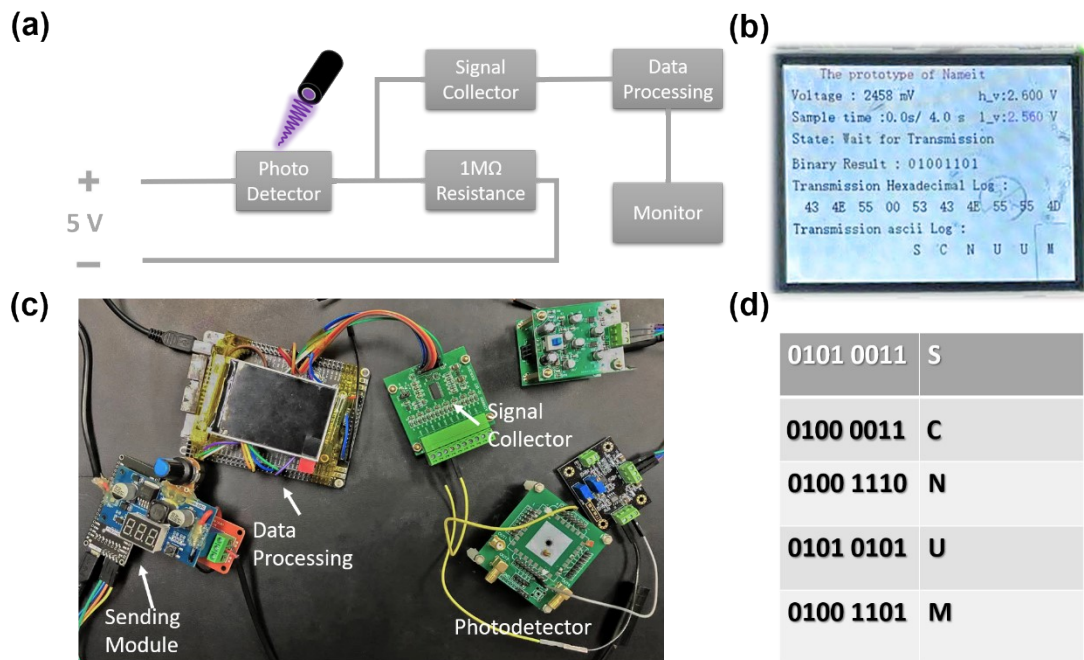

4

5 **Figure S10.** (a) Schematic diagram of the dual-colored optical communication system  
 6 based on the photodetector. (b) The decoding result after receiving signals. (c) A proof  
 7 of concept of the UV communication system. (d) ASCII code for five alphabets  
 8 “SCNUM” as the received signals.

| Device Configuration                                                                  | Light Source              | Response speed<br>(Rise time/Fall time) | Ref.      |
|---------------------------------------------------------------------------------------|---------------------------|-----------------------------------------|-----------|
| Pt/CH <sub>3</sub> NH <sub>3</sub> PbCl <sub>3</sub> /Ti/Au                           | 365 nm                    | 24 ms/62 ms                             | [1]       |
| Cu/MAPbCl <sub>3</sub> -MAPbBr <sub>3</sub> /Cu                                       | 400 nm                    | 376 ms/251 ms                           | [2]       |
| Pt/MAPbBr <sub>3</sub> /Au                                                            | white light               | 70 μs/ 150 μs                           | [3]       |
| Ag/(4-AMP)(MA) <sub>2</sub> Pb <sub>3</sub> Br <sub>10</sub> /MAPbBr <sub>3</sub> /Ag | 405 nm                    | 600 μs/600 μs                           | [4]       |
| FTO/MAPbI <sub>3</sub> Br <sub>3-x</sub> /MAPbBr <sub>3</sub> /Au                     | 450 nm                    | 2.3 s/2.76 s                            | [5]       |
| Au/MAPbI <sub>3</sub> Br <sub>3-x</sub> /MAPbBr <sub>3</sub> /MAPbI <sub>3</sub> /Au  | 805-825 nm/<br>400-805 nm | 3 us/181 us<br>3 us/153 us              | [6]       |
| Au/MAPbCl <sub>3</sub> /MAPbBr <sub>3</sub> /Au                                       | 430 nm                    | 0.43 s/ 1.39 s                          | [7]       |
| Ag/MAPbBr <sub>3</sub> /MAPbCl <sub>3</sub> /Ag                                       | 450 nm/<br>355 nm         | 647 μs/683 μs<br>584 μs/1270 μs         | This work |

1

2 **Table S1.** Comparison of performance parameters of similar structure single crystal  
3 devices<sup>1-7</sup>.

#### 4 Reference

- 5 1. G. Maculan, A. D. Sheikh, A. L. Abdelhady, M. I. Saidaminov, M. A. Haque, B. Murali, E.  
6 Alarousu, O. F. Mohammed, T. Wu and O. M. Bakr, *J. Phys. Chem. Lett.*, 2015, **6**, 3781-3786.  
7 2. X. Qiu, Y. Wang, M. Li, L. Huang, J. Yang, G. Li, X. Zhang, K. Xiao and W. Sun, *Ceram. Int.*,  
8 2023, **49**, 518-527.  
9 3. P. A. Shaikh, D. Shi, J. R. D. Retamal, A. D. Sheikh, M. A. Haque, C.-F. Kang, J.-H. He, O. M.  
10 Bakr and T. Wu, *J. Mater. Chem. C*, 2016, **4**, 8304-8312.  
11 4. X. Zhang, C. Ji, X. Liu, S. Wang, L. Li, Y. Peng, Y. Yao, M. Hong and J. Luo, *Adv. Opt. Mater.*,  
12 2020, **8**, 2000311.  
13 5. M. Cao, J. Tian, Z. Cai, L. Peng, L. Yang and D. Wei, *Appl. Phys. Lett.*, 2016, **109**, DOI:  
14 10.1063/1.4971772.  
15 6. J. Zhao, X. Wang, Y. Xu, Y. Pan, Y. Li, J. Chen, Q. Li, X. Zhang, Z. Zhu and Z. Zhao, *ACS Appl.*  
16 *Mater. Interfaces*, 2022, **14**, 25824-25833.  
17 7. C. Liu, H. Chen, P. Lin, H. Hu, Q. Meng, L. Xu, P. Wang, X. Wu and C. Cui, *J. Phys.: Condens.*  
18 *Matter*, 2022, **34**, 405703.

19
